# Supplementary material for: Terephthalic acid from renewable sources: early-stage sustainability analysis of a bio-PET precursor
Source: Royal Society of Chemistry journal article supplement (doi:10.1039/c8gc03666g), 2019-01-01
Supplement: c8gc03666g1.pdf [file c8gc03666g1.pdf]

**Table S1** LCI Scenario A: PTA from isobutanol

|                              | Process name input                                                                                                                              | Amount  | Unit           |
|------------------------------|-------------------------------------------------------------------------------------------------------------------------------------------------|---------|----------------|
| <i>Cultivation phases</i>    |                                                                                                                                                 |         |                |
|                              | Sweet corn {GLO}  market for sweet corn   Cut-off, U                                                                                            | 8.9E+02 | kg             |
| <i>Isobutanol production</i> |                                                                                                                                                 |         |                |
| <u>Input</u>                 | Water, process, unspecified natural origin/kg                                                                                                   | 1.2E+03 | kg             |
|                              | Sulfuric acid {RER}  production   Cut-off, U                                                                                                    | 6.6E+00 | kg             |
|                              | Sodium hydroxide, without water, in 50% solution state {RER}  chlor-alkali electrolysis, membrane cell   Cut-off, U                             | 9.9E+00 | kg             |
|                              | Ammonium sulfate, as N {RER}  ammonium sulfate production   Cut-off, U                                                                          | 2.6E+00 | kg             |
|                              | Phosphate fertiliser, as P2O5 {RER}  diammonium phosphate production   Cut-off, U                                                               | 2.6E+00 | kg             |
|                              | Electricity, high voltage {RER}  market group for   Cut-off, U                                                                                  | 3.9E+01 | kWh            |
|                              | Heat, district or industrial, natural gas {Europe without Switzerland}  heat production, natural gas, at industrial furnace >100kW   Cut-off, U | 1.3E+03 | MJ             |
| <u>Emission &amp; Waste</u>  | Carbon dioxide, biogenic                                                                                                                        | 6.1E+02 | kg             |
|                              | Heat, waste                                                                                                                                     | 9.3E+02 | MJ             |
|                              | Treatment, sewage, from residence, to wastewater treatment, class 2/CH U                                                                        | 4.4E-01 | m <sup>3</sup> |
| <i>p-Xylene production</i>   |                                                                                                                                                 |         |                |
| <u>Input</u>                 | Heat, district or industrial, natural gas {Europe without Switzerland}  heat production, natural gas, at industrial furnace >100kW   Cut-off, U | 8.2E+02 | MJ             |
|                              | Cooling energy {CH}  from natural gas, at cogen unit with absorption chiller 100kW   Cut-off, U                                                 | 8.1E+02 | MJ             |
|                              | Electricity, high voltage {RER}  market group for   Cut-off, U                                                                                  | 5.6E+01 | MJ             |
| <u>Emission &amp; Waste</u>  | Wastewater, average {Europe without Switzerland}  treatment of wastewater, average, capacity 1E9l/year   Cut-off, U                             | 5.4E+01 | kg             |
| <i>Oxidation to PTA</i>      |                                                                                                                                                 |         |                |
| <u>Input</u>                 | Oxygen                                                                                                                                          | 5.9E+01 | kg             |
|                              | Carbon dioxide, in air                                                                                                                          | 3.5E-01 | kg             |
|                              | Acetic acid, without water, in 98% solution state {RER}  acetic acid production, product in 98% solution state   Cut-off, U                     | 5.4E-01 | kg             |
|                              | Heat, district or industrial, natural gas {Europe without Switzerland}  heat production, natural gas, at industrial furnace >100kW   Cut-off, U | 6.9E+02 | MJ             |
| <u>Emission &amp; Waste</u>  | Oxygen                                                                                                                                          | 1.5E+00 | kg             |
|                              | Carbon dioxide, biogenic                                                                                                                        | 6.0E-01 | kg             |
|                              | Wastewater, average {Europe without Switzerland}  treatment of wastewater, average, capacity 1E9l/year   Cut-off, U                             | 2.2E+01 | kg             |

**Table S2** LCI Scenario B: PTA from HMF and ethylene

| Process name input             |                                                                                                                                                 | Amount  | Unit           |
|--------------------------------|-------------------------------------------------------------------------------------------------------------------------------------------------|---------|----------------|
| <i>Bio-ethylene production</i> |                                                                                                                                                 |         |                |
| <u>Input</u>                   | Ethanol, without water, in 95% solution state, from fermentation {RoW}  ethanol production from maize   Cut-off, U                              | 2.0E+01 | kg             |
|                                | Electricity, high voltage {RER}  market group for   Cut-off, U                                                                                  | 2.1E+01 | MJ             |
|                                | Heavy fuel oil, burned in refinery furnace {Europe without Switzerland}  processing   Cut-off, U                                                | 6.6E+01 | MJ             |
| <u>Emission</u>                | Methane                                                                                                                                         | 1.8E-02 | kg             |
|                                | Carbon monoxide                                                                                                                                 | 2.3E-03 | kg             |
|                                | Carbon dioxide                                                                                                                                  | 3.8E+00 | kg             |
|                                | NM VOC, non-methane volatile organic compounds, unspecified origin                                                                              | 1.3E-04 | kg             |
|                                | Sulfur dioxide                                                                                                                                  | 1.2E-03 | kg             |
|                                | Nitrogen oxides                                                                                                                                 | 1.8E-02 | kg             |
|                                | Dinitrogen monoxide                                                                                                                             | 1.4E-04 | kg             |
| <i>p-Xylene production</i>     |                                                                                                                                                 |         |                |
| <u>Input</u>                   | Sugar, from sugar beet {RoW}  beet sugar production   Cut-off, U                                                                                | 1.0E+02 | kg             |
|                                | Hydrogen, liquid {RER}  chlor-alkali electrolysis, membrane cell   Cut-off, U                                                                   | 2.9E+00 | kg             |
|                                | Water, cooling, unspecified natural origin, RER                                                                                                 | 2.7E+00 | m <sup>3</sup> |
|                                | Electricity, high voltage {RER}  market group for   Cut-off, U                                                                                  | 3.4E+01 | MJ             |
|                                | Steam, in chemical industry {RER}  production   Cut-off, U                                                                                      | 1.0E+03 | kg             |
| <u>Emission &amp; Waste</u>    | Carbon dioxide                                                                                                                                  | 2.3E+00 | kg             |
|                                | Wastewater, average {Europe without Switzerland}  treatment of wastewater, average, capacity 1E9l/year   Cut-off, U                             | 4.7E+01 | kg             |
| <i>Oxidation to PTA</i>        |                                                                                                                                                 |         |                |
| <u>Input</u>                   | Oxygen                                                                                                                                          | 5.9E+01 | kg             |
|                                | Carbon dioxide, in air                                                                                                                          | 3.5E-01 | kg             |
|                                | Acetic acid, without water, in 98% solution state {RER}  acetic acid production, product in 98% solution state   Cut-off, U                     | 5.4E-01 | kg             |
|                                | Heat, district or industrial, natural gas {Europe without Switzerland}  heat production, natural gas, at industrial furnace >100kW   Cut-off, U | 6.9E+02 | MJ             |
| <u>Emission &amp; Waste</u>    | Oxygen                                                                                                                                          | 1.5E+00 | kg             |
|                                | Carbon dioxide, biogenic                                                                                                                        | 6.0E-01 | kg             |
|                                | Wastewater, average {Europe without Switzerland}  treatment of wastewater, average, capacity 1E9l/year   Cut-off, U                             | 2.2E+01 | kg             |

**Table S3** LCI Scenario C: PTA from orange peels

|                             | Process name input                                                                                                                              | Amount  | Unit           |
|-----------------------------|-------------------------------------------------------------------------------------------------------------------------------------------------|---------|----------------|
| <i>p-Cymene production</i>  |                                                                                                                                                 |         |                |
| <u>Input</u>                | Orange peels                                                                                                                                    | 4.1E+03 | kg             |
|                             | Water, process, unspecified natural origin/kg                                                                                                   | 4.1E+02 | kg             |
|                             | Electricity, high voltage {RER}  market group for   Cut-off, U                                                                                  | 3.6E+02 | kWh            |
|                             | Steam, in chemical industry {RER}  production   Cut-off, U                                                                                      | 2.3E+02 | kg             |
|                             | Water, cooling, unspecified natural origin, RER                                                                                                 | 5.2E+01 | m <sup>3</sup> |
| <u>Waste</u>                | Wastewater, average {Europe without Switzerland}  treatment of wastewater, average, capacity 1E9l/year   APOS, U                                | 3.5E+03 | kg             |
| <u>Avoided product</u>      | Composting of wastes                                                                                                                            | 1.7E+04 | kg             |
| <i>Oxidation to PTA</i>     |                                                                                                                                                 |         |                |
| <u>Input</u>                | Oxygen                                                                                                                                          | 1.7E+01 | kg             |
|                             | Heat, district or industrial, natural gas {Europe without Switzerland}  heat production, natural gas, at industrial furnace >100kW   Cut-off, U | 5.1E+01 | MJ             |
|                             | Cooling energy {CH}  from natural gas, at cogen unit with absorption chiller 100kW   Cut-off, U                                                 | 3.3E+02 | MJ             |
|                             | Electricity, high voltage {RER}  market group for   Cut-off, U                                                                                  | 4.8E+01 | MJ             |
| <u>Emission &amp; Waste</u> | Wastewater, average {Europe without Switzerland}  treatment of wastewater, average, capacity 1E9l/year   Cut-off, U                             | 7.3E+00 | kg             |

**Table S4** LCI Scenario D: PTA from crude oil

|                             | Process name input                                                                          | Amount  | Unit           |
|-----------------------------|---------------------------------------------------------------------------------------------|---------|----------------|
| <i>PTA production</i>       |                                                                                             |         |                |
| <u>Input</u>                | Water, cooling, unspecified natural origin, RER                                             | 3.4E-01 | m <sup>3</sup> |
|                             | Acetic acid, without water, in 98% solution state {GLO}  market for   Cut-off, U            | 5.0E+01 | kg             |
|                             | Chemical factory, organics {GLO}  market for   Cut-off, U                                   | 4.0E-07 | p              |
|                             | Electricity, medium voltage {RER}  market group for   Cut-off, U                            | 4.7E+02 | kWh            |
|                             | Heat, district or industrial, natural gas {RER}  market group for   Cut-off, U              | 4.6E+02 | MJ             |
|                             | Heat, district or industrial, other than natural gas {RER}  market group for   Cut-off, U   | 1.2E+03 | MJ             |
|                             | Nitrogen, liquid {RER}  market for   Cut-off, U                                             | 4.9E+01 | kg             |
|                             | Sodium hydroxide, without water, in 50% solution state {GLO}  market for   Cut-off, U       | 1.5E+00 | kg             |
|                             | Steam, in chemical industry {GLO}  market for   Cut-off, U                                  | 6.4E+02 | kg             |
|                             | Water, completely softened, from decarbonised water, at user {GLO}  market for   Cut-off, U | 4.3E+02 | kg             |
|                             | Xylene {GLO}  market for   Cut-off, U                                                       | 6.6E+02 | kg             |
| <u>Emission &amp; Waste</u> | Hydrocarbons, aromatic                                                                      | 0.378   | kg             |
|                             | NMVOC, non-methane volatile organic compounds, unspecified origin                           | 0.11    | kg             |
|                             | Particulates, < 2.5 um                                                                      | 0.02    | kg             |
|                             | Particulates, > 10 um                                                                       | 0.03    | kg             |
|                             | Particulates, > 2.5 um, and < 10um                                                          | 0.04    | kg             |
|                             | Water/m3                                                                                    | 0.22    | m <sup>3</sup> |
|                             | Average incineration residue {GLO}  market for   Cut-off, U                                 | 6.00    | kg             |
|                             | Hazardous waste, for underground deposit {GLO}  market for   Cut-off, U                     | 0.20    | kg             |

**Table S5** Contribution analysis of the midpoint impacts of the scenarios (Cut-off >2%).

|                              |                                                                                                                                                 | Global warming<br>kg CO <sub>2</sub> eq | Fine particulate<br>matter formation<br>kg PM2.5 eq | Human<br>toxicity<br>kg 1,4-DCB | Water<br>consumption<br>m <sup>3</sup> | Terrestrial<br>acidification<br>kg SO <sub>2</sub> eq | Land use<br>m <sup>2</sup> ·a crop eq | Fossil resource<br>scarcity<br>kg oil eq |
|------------------------------|-------------------------------------------------------------------------------------------------------------------------------------------------|-----------------------------------------|-----------------------------------------------------|---------------------------------|----------------------------------------|-------------------------------------------------------|---------------------------------------|------------------------------------------|
| <b>Scenario A</b>            | <b>Total</b>                                                                                                                                    | <b>5.8E+03</b>                          | <b>9.4E+00</b>                                      | <b>2.5E+03</b>                  | <b>4.2E+02</b>                         | <b>4.3E+01</b>                                        | <b>2.0E+03</b>                        | <b>1.7E+03</b>                           |
| <i>Amoco® process</i>        | Heat, district or industrial, natural gas {Europe without Switzerland}  heat production, natural gas, at industrial furnace >100kW   Cut-off, U | 4.9E+02                                 | 8.6E-02                                             | 1.4E+01                         | 1.5E-01                                | 2.5E-01                                               | 3.1E-01                               | 1.9E+02                                  |
| <i>GEVO® process</i>         | Cooling energy {CH}  from natural gas, at cogen unit with absorption chiller 100kW   Cut-off, U                                                 | 9.2E+02                                 | 3.0E-01                                             | 4.8E+02                         | 6.5E+00                                | 8.7E-01                                               | 2.5E+00                               | 3.2E+02                                  |
|                              | Heat, district or industrial, natural gas {Europe without Switzerland}  heat production, natural gas, at industrial furnace >100kW   Cut-off, U | 5.6E+02                                 | 9.9E-02                                             | 1.6E+01                         | 1.7E-01                                | 2.9E-01                                               | 3.5E-01                               | 2.2E+02                                  |
| <i>Isobutanol production</i> | Sweet corn {GLO}  market for sweet corn   Cut-off, U                                                                                            | 2.6E+03                                 | 7.9E+00                                             | 1.5E+03                         | 4.0E+02                                | 3.9E+01                                               | 2.0E+03                               | 5.0E+02                                  |
|                              | Phosphate fertiliser, as P2O5 {RER}  diammonium phosphate production   Cut-off, U                                                               | 3.8E+01                                 | 1.4E-01                                             | 8.9E+01                         | 2.4E+00                                | 3.7E-01                                               | 7.8E+00                               | 1.7E+01                                  |
|                              | Sulfuric acid {RER}  production   Cut-off, U                                                                                                    | 6.9E+00                                 | 1.3E-01                                             | 2.6E+01                         | 1.7E+00                                | 4.3E-01                                               | 3.1E-01                               | 9.8E+00                                  |
|                              | Sodium hydroxide, without water, in 50% solution state {RER}  chlor-alkali electrolysis, membrane cell   Cut-off, U                             | 7.9E+01                                 | 1.5E-01                                             | 1.2E+02                         | 2.8E+00                                | 3.7E-01                                               | 3.0E+00                               | 1.9E+01                                  |
|                              | Ammonium sulfate, as N {RER}  ammonium sulfate production   Cut-off, U                                                                          | 5.3E+01                                 | 5.7E-02                                             | 7.5E+01                         | 1.9E-01                                | 1.4E-01                                               | 2.1E+00                               | 1.7E+01                                  |
|                              | Heat, district or industrial, natural gas {Europe without Switzerland}  heat production, natural gas, at industrial furnace >100kW   Cut-off, U | 8.7E+02                                 | 1.5E-01                                             | 2.5E+01                         | 2.7E-01                                | 4.5E-01                                               | 5.5E-01                               | 3.4E+02                                  |
|                              | Electricity, high voltage {RER}  market group for   Cut-off, U                                                                                  | 1.7E+02                                 | 2.7E-01                                             | 1.3E+02                         | 2.7E+00                                | 7.5E-01                                               | 6.0E+00                               | 4.2E+01                                  |
| <b>Scenario B</b>            | <b>Total</b>                                                                                                                                    | <b>5.0E+03</b>                          | <b>5.9E+00</b>                                      | <b>1.3E+03</b>                  | <b>1.9E+02</b>                         | <b>2.2E+01</b>                                        | <b>1.0E+03</b>                        | <b>1.5E+03</b>                           |
| <i>Amoco® process</i>        | Heat, district or industrial, natural gas {Europe without Switzerland}  heat production, natural gas, at industrial furnace >100kW   Cut-off, U | 4.9E+02                                 | 8.6E-02                                             | 1.4E+01                         | 1.5E-01                                | 2.5E-01                                               | 3.1E-01                               | 1.9E+02                                  |
| <i>Diels-Alder reaction</i>  | Steam, in chemical industry {RER}  production   Cut-off, U                                                                                      | 2.8E+03                                 | 2.0E+00                                             | 3.2E+02                         | 4.0E+00                                | 5.9E+00                                               | 2.7E+01                               | 8.8E+02                                  |
|                              | Hydrogen, liquid {RER}  chlor-alkali electrolysis, membrane cell   Cut-off, U                                                                   | 3.3E+02                                 | 6.0E-01                                             | 4.9E+02                         | 1.1E+01                                | 1.5E+00                                               | 1.2E+01                               | 7.9E+01                                  |
|                              | Electricity, high voltage {RER}  market group for   Cut-off, U                                                                                  | 4.1E+01                                 | 6.5E-02                                             | 3.2E+01                         | 6.6E-01                                | 1.8E-01                                               | 1.5E+00                               | 1.0E+01                                  |
| <i>Ethylene production</i>   | Heavy fuel oil, burned in refinery furnace {Europe without Switzerland}  processing   Cut-off, U                                                | 5.5E+01                                 | 2.0E-01                                             | 5.6E+00                         | 1.1E-01                                | 6.2E-01                                               | 9.4E-02                               | 1.9E+01                                  |
|                              | Maize grain {GLO}  market for   Cut-off, U                                                                                                      | 4.0E+02                                 | 8.8E-01                                             | 1.0E+02                         | 1.1E+02                                | 3.2E+00                                               | 4.6E+02                               | 7.4E+01                                  |

|                            |                                                                                                                                                 |                |                |                 |                |                |                |                |
|----------------------------|-------------------------------------------------------------------------------------------------------------------------------------------------|----------------|----------------|-----------------|----------------|----------------|----------------|----------------|
|                            | Electricity, medium voltage {RER}  market group for   Cut-off, U                                                                                | 6.1E+01        | 1.3E-01        | 2.9E+01         | 3.7E-01        | 2.2E-01        | 6.7E-01        | 1.4E+01        |
|                            | Heat, district or industrial, natural gas {RER}  market group for   Cut-off, U                                                                  | 1.5E+02        | 3.2E-02        | 5.1E+00         | 8.0E-02        | 9.4E-02        | 1.0E-01        | 6.0E+01        |
| <i>HMF production</i>      | Sugar beet {RoW}  market for sugar beet   Cut-off, U                                                                                            | 3.0E+02        | 1.4E+00        | 6.7E+01         | 4.5E+01        | 9.0E+00        | 5.3E+02        | 5.0E+01        |
|                            | Electricity, high voltage {RER}  market group for   Cut-off, U                                                                                  | 1.2E+02        | 2.6E-01        | 5.5E+01         | 7.0E-01        | 4.1E-01        | 1.3E+00        | 2.7E+01        |
|                            | Transport, tractor and trailer, agricultural {GLO}  market for   Cut-off, U                                                                     | 1.8E+01        | 4.3E-02        | 4.7E+01         | 8.3E-02        | 8.2E-02        | 1.2E+00        | 4.8E+00        |
|                            | Tap water {RoW}  market for   Cut-off, U                                                                                                        | 2.5E+00        | 5.2E-03        | 2.1E+00         | 4.2E+00        | 9.5E-03        | 4.3E-02        | 6.0E-01        |
| <b>Scenario C</b>          | <b>Total</b>                                                                                                                                    | <b>4.7E+01</b> | <b>1.7E+00</b> | <b>-4.6E+03</b> | <b>2.1E+02</b> | <b>5.1E+00</b> | <b>3.2E+01</b> | <b>4.9E+02</b> |
| <i>Oxidation to PTA</i>    | Cooling energy {CH}  from natural gas, at cogen unit with absorption chiller 100kW   Cut-off, U                                                 | 3.9E+02        | 1.3E-01        | 2.0E+02         | 2.7E+00        | 3.7E-01        | 1.1E+00        | 1.4E+02        |
|                            | Electricity, high voltage {RER}  market group for   Cut-off, U                                                                                  | 6.0E+01        | 9.4E-02        | 4.7E+01         | 9.6E-01        | 2.7E-01        | 2.1E+00        | 1.5E+01        |
|                            | Heat, district or industrial, natural gas {Europe without Switzerland}  heat production, natural gas, at industrial furnace >100kW   Cut-off, U | 3.6E+01        | 6.4E-03        | 1.0E+00         | 1.1E-02        | 1.9E-02        | 2.3E-02        | 1.4E+01        |
| <i>p-Cymene production</i> | Electricity, high voltage {RER}  market group for   Cut-off, U                                                                                  | 6.7E+02        | 1.1E+00        | 5.3E+02         | 1.1E+01        | 3.0E+00        | 2.4E+01        | 1.7E+02        |
|                            | Water, cooling, unspecified natural origin, RER                                                                                                 | 2.0E+00        | 1.0E-02        | 0.0E+00         | 2.2E+02        | 0.0E+00        | 1.0E-01        | 1.0E+00        |
|                            | Avoided composting                                                                                                                              | -1.4E+03       | 2.4E-01        | -5.4E+03        | -1.3E+01       | 8.1E-01        | 2.0E+00        | 6.7E+01        |
|                            | Steam, in chemical industry {RER}  production   Cut-off, U                                                                                      | 2.8E+02        | 2.0E-01        | 3.1E+01         | 4.0E-01        | 5.9E-01        | 2.6E+00        | 8.7E+01        |
|                            | Wastewater, average {Europe without Switzerland}  treatment of wastewater, average, capacity 1E9l/year   Cut-off, U                             | 7.7E+00        | 1.8E-02        | 4.4E+01         | -1.3E+01       | 5.7E-02        | 3.9E-01        | 1.6E+00        |
| <b>Scenario D</b>          | <b>Total</b>                                                                                                                                    | <b>1.9E+03</b> | <b>1.9E+00</b> | <b>1.0E+03</b>  | <b>2.7E+01</b> | <b>5.4E+00</b> | <b>2.8E+01</b> | <b>1.2E+03</b> |
| <i>Oxidation to PTA</i>    | Steam, in chemical industry {GLO}  market for   Cut-off, U                                                                                      | 2.1E+02        | 1.9E-01        | 3.2E+01         | 2.5E-01        | 5.3E-01        | 1.1E+00        | 6.1E+01        |
|                            | Electricity, medium voltage {RER}  market group for   Cut-off, U                                                                                | 2.1E+02        | 3.3E-01        | 1.8E+02         | 3.4E+00        | 9.5E-01        | 7.5E+00        | 5.3E+01        |
|                            | Nitrogen, liquid {RER}  market for   Cut-off, U                                                                                                 | 1.3E+01        | 2.0E-02        | 1.1E+01         | 6.0E-01        | 5.6E-02        | 4.5E-01        | 3.2E+00        |
|                            | Acetic acid, without water, in 98% solution state {GLO}  market for   Cut-off, U                                                                | 9.2E+01        | 1.6E-01        | 7.7E+01         | 2.3E+00        | 3.5E-01        | 1.5E+00        | 5.3E+01        |
|                            | Heat, district or industrial, other than natural gas {RER}  market group for   Cut-off, U                                                       | 1.1E+02        | 1.5E-01        | 2.5E+01         | 5.8E-01        | 4.6E-01        | 9.3E+00        | 2.9E+01        |
|                            | Chemical factory, organics {GLO}  market for   Cut-off, U                                                                                       | 6.9E+01        | 2.2E-01        | 5.7E+02         | 5.7E-01        | 4.8E-01        | 6.4E+00        | 1.5E+01        |
|                            | Xylene {RER}  Cut-off, U                                                                                                                        | 1.2E+03        | 7.8E-01        | 3.6E+00         | 1.9E+01        | 2.4E+00        | 0.0E+00        | 9.2E+02        |

**Table S6** Contribution of the phases of the processes on the impacts of the scenarios.

| Impact Category                                        | Scenario A                                                                                                             | Scenario B                                                                                                                                          | Scenario C                                                                                      | Scenario D                                                                                      |
|--------------------------------------------------------|------------------------------------------------------------------------------------------------------------------------|-----------------------------------------------------------------------------------------------------------------------------------------------------|-------------------------------------------------------------------------------------------------|-------------------------------------------------------------------------------------------------|
| Global warming (GW)<br>kg CO <sub>2</sub> eq           | <ul style="list-style-type: none"> <li>Amoco® process</li> <li>GEVO® process</li> <li>Isobutanol production</li> </ul> | <ul style="list-style-type: none"> <li>Amoco® process</li> <li>Diels-Alder reaction</li> <li>Ehtylene production</li> <li>HMF production</li> </ul> | <ul style="list-style-type: none"> <li>Oxidation to PTA</li> <li>p-Cymene production</li> </ul> | <ul style="list-style-type: none"> <li>Oxidation to PTA</li> <li>p-Xylene production</li> </ul> |
| Fine particular matter formation (FPMF)<br>kg PM2.5 eq | <ul style="list-style-type: none"> <li>Amoco® process</li> <li>GEVO® process</li> <li>Isobutanol production</li> </ul> | <ul style="list-style-type: none"> <li>Amoco® process</li> <li>Diels-Alder reaction</li> <li>Ehtylene production</li> <li>HMF production</li> </ul> | <ul style="list-style-type: none"> <li>Oxidation to PTA</li> <li>p-Cymene production</li> </ul> | <ul style="list-style-type: none"> <li>Oxidation to PTA</li> <li>p-Xylene production</li> </ul> |
| Human toxicity (HT)<br>kg 1,4-DCB                      | <ul style="list-style-type: none"> <li>Amoco® process</li> <li>GEVO® process</li> <li>Isobutanol production</li> </ul> | <ul style="list-style-type: none"> <li>Amoco® process</li> <li>Diels-Alder reaction</li> <li>Ehtylene production</li> <li>HMF production</li> </ul> | <ul style="list-style-type: none"> <li>Oxidation to PTA</li> <li>p-Cymene production</li> </ul> | <ul style="list-style-type: none"> <li>Oxidation to PTA</li> <li>p-Xylene production</li> </ul> |
| Water consumption (WC)<br>m <sup>3</sup>               | <ul style="list-style-type: none"> <li>Amoco® process</li> <li>GEVO® process</li> <li>Isobutanol production</li> </ul> | <ul style="list-style-type: none"> <li>Amoco® process</li> <li>Diels-Alder reaction</li> <li>Ehtylene production</li> <li>HMF production</li> </ul> | <ul style="list-style-type: none"> <li>Oxidation to PTA</li> <li>p-Cymene production</li> </ul> | <ul style="list-style-type: none"> <li>Oxidation to PTA</li> <li>p-Xylene production</li> </ul> |

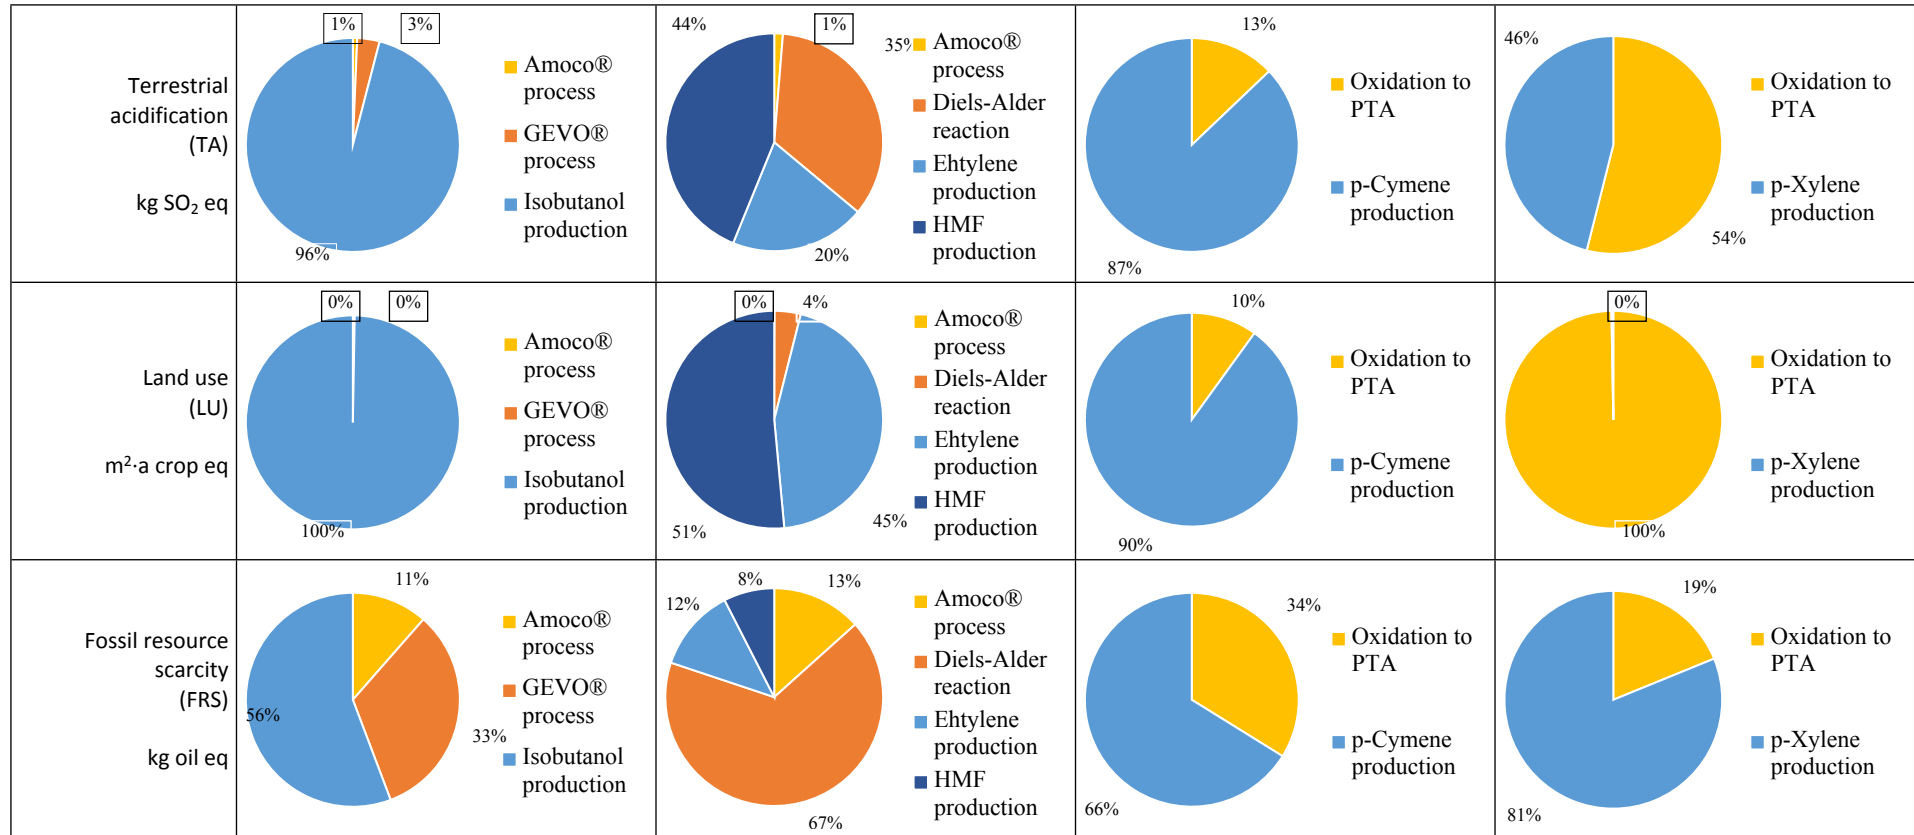

General legend:

- Final oxidation steps (*Amoco process* and *Oxidation to PTA*)
- Transformations to p-Xylene (*GEVO process* and *Diels-Alder reaction*)
- Raw materials (*Isobutanol, Ethylene, HMF, p-Cymene* and *p-Xylene*)

- Negative impacts
- Positive impacts



**Table S7** Comparison between PTA production scenarios in terms of ReCiPe 2016 Endpoint H/A – Characterization analysis

| Impact category                            | Unit           | Scenario A           | Scenario B           | Scenario C            | Scenario D           |
|--------------------------------------------|----------------|----------------------|----------------------|-----------------------|----------------------|
| Global warming – Human Health              | DALY           | $5.42 \cdot 10^{-3}$ | $4.65 \cdot 10^{-3}$ | $4.37 \cdot 10^{-5}$  | $1.78 \cdot 10^{-3}$ |
| Fine particulate matter formation          | DALY           | $5.90 \cdot 10^{-3}$ | $3.70 \cdot 10^{-3}$ | $1.10 \cdot 10^{-3}$  | $1.23 \cdot 10^{-3}$ |
| Human toxicity                             | DALY           | $9.50 \cdot 10^{-4}$ | $5.35 \cdot 10^{-4}$ | $-1.39 \cdot 10^{-3}$ | $4.70 \cdot 10^{-4}$ |
| Water consumption – Human Health           | DALY           | $9.73 \cdot 10^{-4}$ | $4.29 \cdot 10^{-4}$ | $4.69 \cdot 10^{-4}$  | $5.97 \cdot 10^{-5}$ |
| Global warming – Terrestrial Ecosystems    | species-y<br>r | $1.64 \cdot 10^{-5}$ | $1.40 \cdot 10^{-5}$ | $1.33 \cdot 10^{-7}$  | $5.37 \cdot 10^{-6}$ |
| Terrestrial acidification                  | species-y<br>r | $9.22 \cdot 10^{-6}$ | $4.68 \cdot 10^{-6}$ | $1.08 \cdot 10^{-6}$  | $1.15 \cdot 10^{-6}$ |
| Land use                                   | species-y<br>r | $1.74 \cdot 10^{-5}$ | $9.23 \cdot 10^{-6}$ | $2.83 \cdot 10^{-7}$  | $2.48 \cdot 10^{-7}$ |
| Water consumption – Terrestrial Ecosystems | species-y<br>r | $5.91 \cdot 10^{-6}$ | $2.61 \cdot 10^{-6}$ | $2.85 \cdot 10^{-6}$  | $3.63 \cdot 10^{-7}$ |
| Fossil resource scarcity                   | USD2013        | $5.79 \cdot 10^2$    | $4.73 \cdot 10^2$    | $1.27 \cdot 10^2$     | $4.42 \cdot 10^2$    |

**Table S8** Comparison between PTA production scenarios in terms of ReCiPe 2016 H/A – Single Score

| Impact category                   | Unit      | Scenario A    | Scenario B    | Scenario C   | Scenario D    |
|-----------------------------------|-----------|---------------|---------------|--------------|---------------|
| <b>Total impact</b>               | <b>Pt</b> | <b>746.13</b> | <b>558.89</b> | <b>96.58</b> | <b>372.46</b> |
| Global warming                    | Pt        | 143.63        | 123.20        | 1.16         | 47.10         |
| Fine particulate matter formation | Pt        | 116.94        | 73.34         | 21.73        | 24.42         |
| Human toxicity                    | Pt        | 18.83         | 10.60         | -27.53       | 9.31          |
| Water consumption                 | Pt        | 32.35         | 14.26         | 15.60        | 1.99          |
| Terrestrial acidification         | Pt        | 20.39         | 10.35         | 2.39         | 2.55          |
| Land use                          | Pt        | 38.58         | 20.43         | 0.63         | 0.55          |
| Fossil resource scarcity          | Pt        | 375.40        | 306.71        | 82.60        | 286.54        |

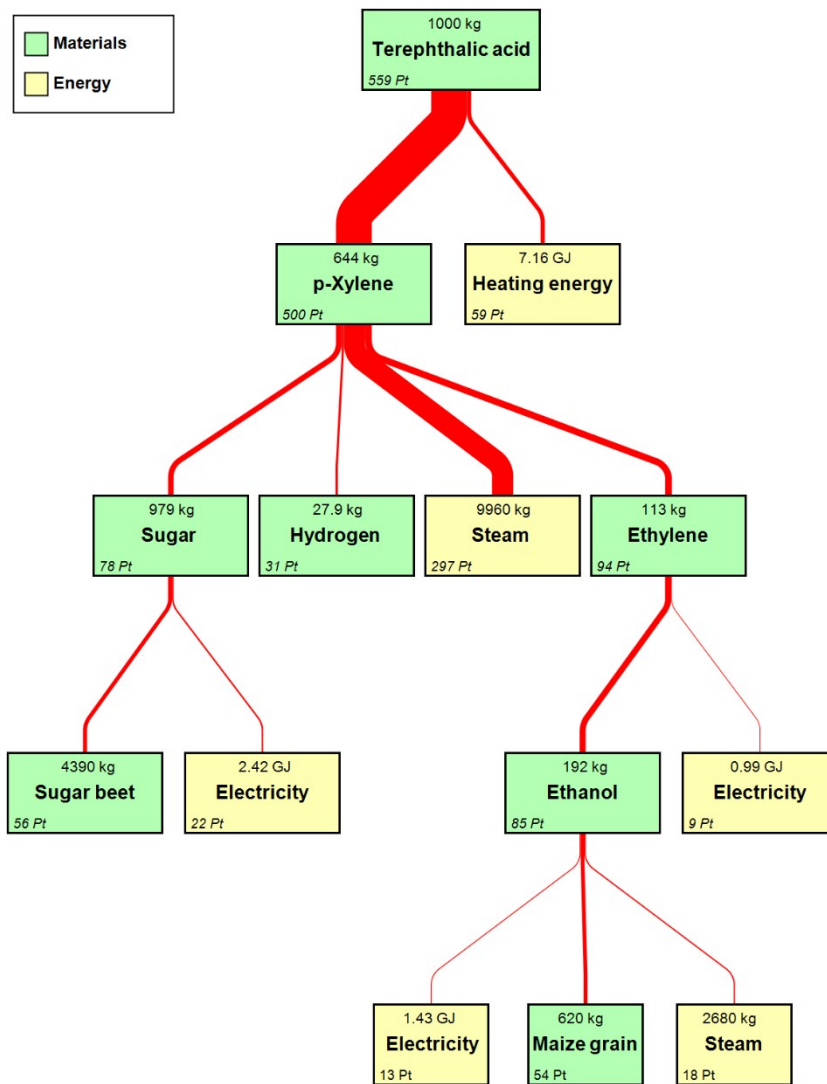

**Fig. S1** Contribution analysis for Scenario B (ReCiPe 2016 H/A).

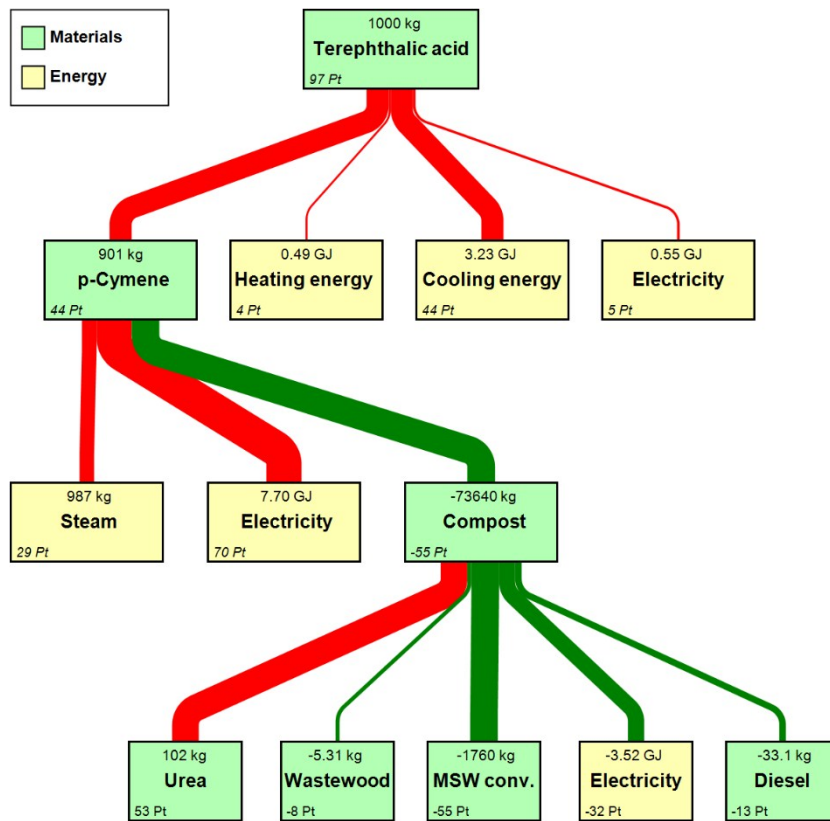

Fig. S2 Contribution analysis for Scenario C (ReCiPe 2016 H/A).

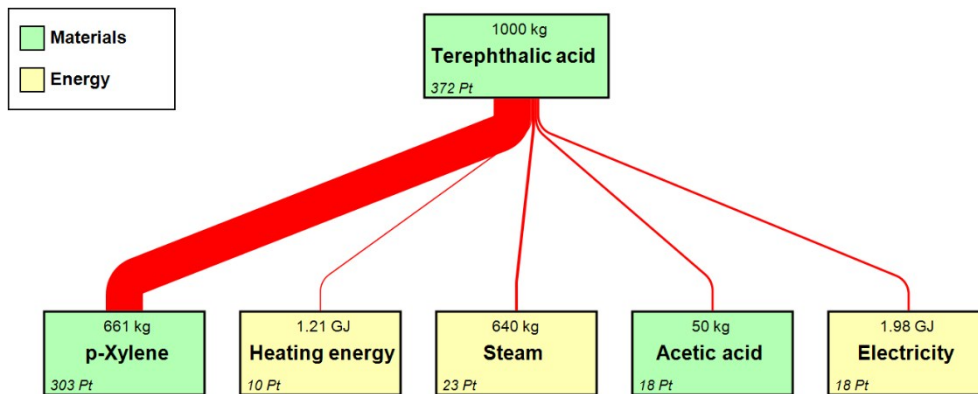

Fig. S3 Contribution analysis for Scenario D (ReCiPe 2016 H/A).

**Table S9** Comparison of standard Scenario A and Scenario B with those with 50% waste biomass (ReCiPe 2016 H/A - Single Score).

| <b>Impact category</b>            | <b>Unit</b> | <b>Scenario A</b> | <b>Scenario A_50%</b> | <b>Difference</b> | <b>Scenario B</b> | <b>Scenario B_50%</b> | <b>Difference</b> |
|-----------------------------------|-------------|-------------------|-----------------------|-------------------|-------------------|-----------------------|-------------------|
| <b>Total impact</b>               | <b>Pt</b>   | <b>746.13</b>     | <b>560.80</b>         | <b>- 24.8%</b>    | <b>558.89</b>     | <b>504.75</b>         | <b>- 9.7%</b>     |
| Global warming                    | Pt          | 143.63            | 111.88                | - 22.1%           | 123.20            | 114.57                | - 7.0%            |
| Fine particulate matter formation | Pt          | 116.94            | 67.83                 | - 42.0%           | 73.34             | 59.13                 | - 19.4%           |
| Human toxicity                    | Pt          | 18.83             | 13.13                 | - 30.3%           | 10.60             | 9.64                  | - 9.1%            |
| Water consumption                 | Pt          | 32.35             | 17.69                 | - 45.3%           | 14.26             | 8.72                  | - 38.9%           |
| Terrestrial acidification         | Pt          | 20.39             | 11.20                 | - 45.1%           | 10.35             | 7.48                  | - 27.7%           |
| Land use                          | Pt          | 38.58             | 19.54                 | - 49.4%           | 20.43             | 10.67                 | - 47.8%           |
| Fossil resource scarcity          | Pt          | 375.40            | 319.53                | - 14.9%           | 306.71            | 294.54                | - 4.0%            |
